# Supplementary material
Source: PubMed Central journal article supplement (PMC2867737)
Supplement: 0910339107_pnas.200910339SI.pdf [file 0910339107_pnas.200910339SI.pdf]

# Supporting Information

Liao et al. 10.1073/pnas.0910339107

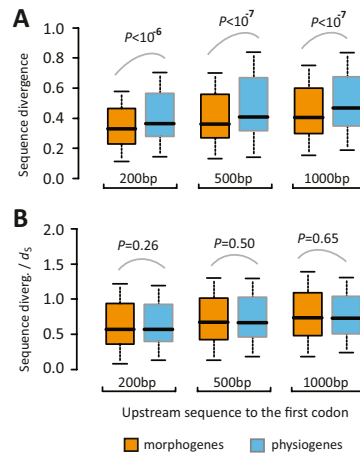

**Fig. S1.** Evolutionary divergences between mouse and human orthologous genes in noncoding regions upstream of the first codon. (A) Sequence divergence (1 – identity). (B) Sequence divergence, controlled for local mutation rates by  $d_s$ . The values of upper quartile, median, and lower quartile are indicated in each box, whereas the bars outside the box indicate semi-quartile ranges.  $P$  values are from a Mann–Whitney  $U$  test.

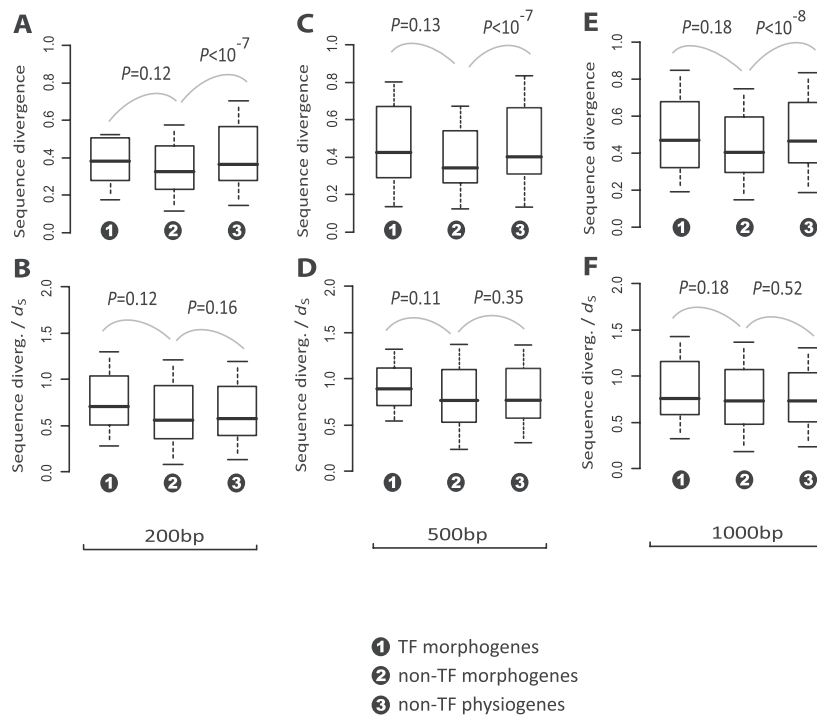

**Fig. S2.** Comparison of sequence divergences between mouse and human orthologous genes in noncoding regions upstream of the first codon among morphogenes encoding transcription factors (TFs), morphogenes encoding non-TFs, and physiogenes encoding non-TFs. Physiogenes encoding TFs are not examined due to the extremely small sample size. Sequence divergences within 200 bp, 500 bp, and 1000 bp are presented in A, C, and E, respectively, while the divergences controlled for local mutation rates are presented in B, D, and F, respectively. The values of upper quartile, median, and lower quartile are indicated in each box, whereas the bars outside the box indicate semi-quartile ranges.  $P$  values are from a Mann–Whitney  $U$  test.

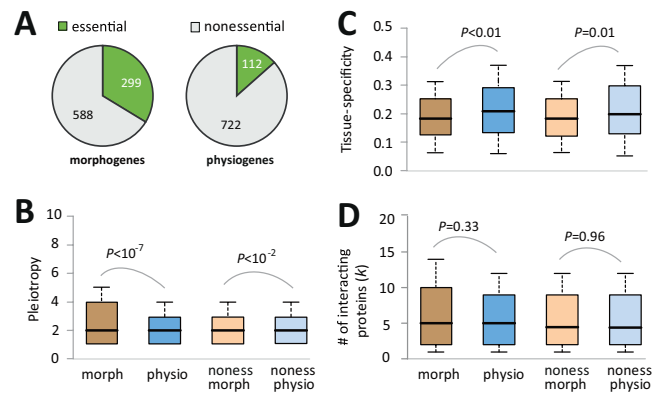

**Fig. S3.** Comparison of morphogenes and physiogenes in basic properties when 30% of traits are randomly removed. (A) Morphogenes are more likely to be essential than physiogenes ( $P < E-22$ ,  $\chi^2$  test). (B) Morphogenes are more pleiotropic than physiogenes. (C) Morphogenes are less tissue specific than physiogenes. (D) Morphogenes and physiogenes have similar numbers of protein–protein interaction partners.

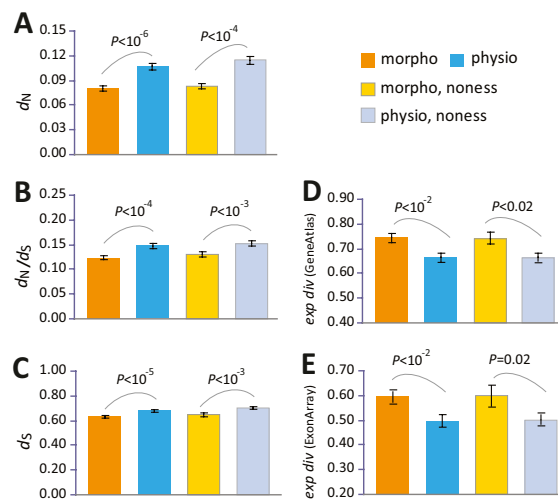

**Fig. S4.** Evolutionary divergences between mouse and human orthologous genes measured by (A) nonsynonymous distance ( $d_N$ ), (B)  $d_N/d_S$ , (C) synonymous distance ( $d_S$ ), (D) expression-profile distance from GeneAtlas data, and (E) expression-profile distance from ExonArrays data. Morphogenes and physiogenes are redefined after the random removal of 30% of traits associated with each gene. Error bars show one standard error of the mean.  $P$  values are from a Mann–Whitney  $U$  test. Morpho, morphogenes; noness, nonessential; physio, physiogenes.

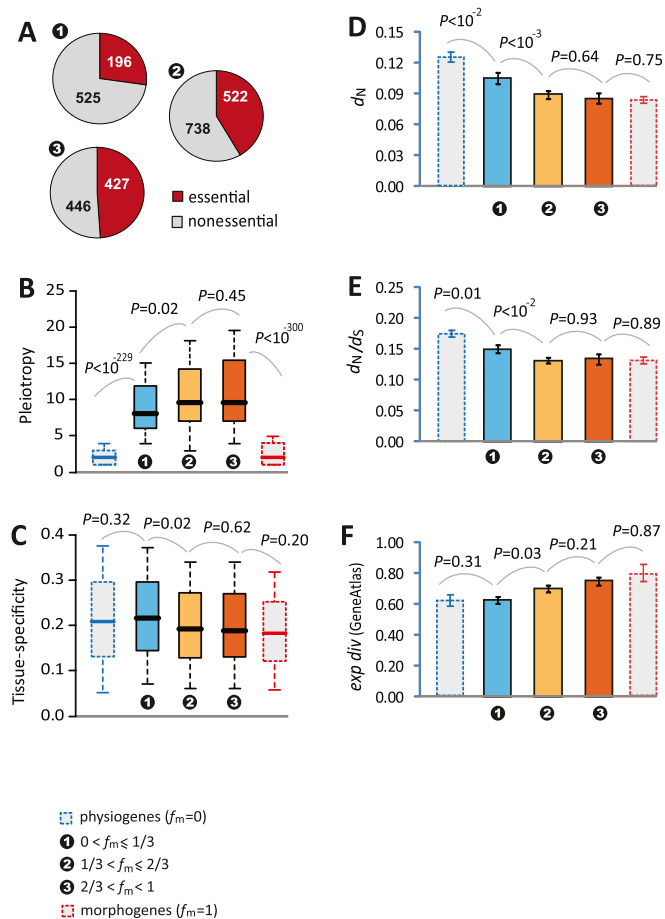

**Fig. S5.** Comparison among five groups of genes classified on the basis of the fraction ( $f_m$ ) of mutant phenotypes that are morphological. (A) Numbers of essential and nonessential genes. (B) Degree of pleiotropy. (C) Tissue specificity in gene expression. (D) Nonsynonymous distances between human and mouse orthologs. (E) Ratio of nonsynonymous to synonymous distances. (F) Gene expression-profile divergences between human and mouse orthologs. Note that the higher pleiotropy of the three middle groups of genes than the two boundary groups in B is likely due to the ascertainment bias that the middle groups are examined for more traits per mutant mouse.  $P$  values are from a Mann-Whitney U test.

## Other Supporting Information Files

[Table S1 \(DOC\)](#)

[Table S2 \(DOC\)](#)

[Table S3 \(DOC\)](#)

[Table S4 \(DOC\)](#)
